# Supplementary material
Source: ML conference proceedings conference paper supplement (https://openaccess.thecvf.com/content/CVPR_2020/html/Ansari_A_Characteristic_Function_CVPR_2020_paper.html)
Supplement: Supplementary file 2 [file Ansari_A_Characteristic_Function_CVPR_2020_supplemental.zip]

Archive with 59 entries (54 files):
- 06863-appendix.pdf
- 06863-code/
- 06863-code/.DS_Store
- __MACOSX/06863-code/._.DS_Store
- 06863-code/OCFGAN-master/
- __MACOSX/06863-code/._OCFGAN-master
- 06863-code/ReadMe.txt
- 06863-code/OCFGAN-master/celeba.sh
- __MACOSX/06863-code/OCFGAN-master/._celeba.sh
- 06863-code/OCFGAN-master/.DS_Store
- __MACOSX/06863-code/OCFGAN-master/._.DS_Store
- 06863-code/OCFGAN-master/LICENSE
- __MACOSX/06863-code/OCFGAN-master/._LICENSE
- 06863-code/OCFGAN-master/imgs/
- __MACOSX/06863-code/OCFGAN-master/._imgs
- 06863-code/OCFGAN-master/download.py
- __MACOSX/06863-code/OCFGAN-master/._download.py
- 06863-code/OCFGAN-master/cifar10.sh
- __MACOSX/06863-code/OCFGAN-master/._cifar10.sh
- 06863-code/OCFGAN-master/mnist.sh
- __MACOSX/06863-code/OCFGAN-master/._mnist.sh
- 06863-code/OCFGAN-master/README.md
- __MACOSX/06863-code/OCFGAN-master/._README.md
- 06863-code/OCFGAN-master/.gitignore
- __MACOSX/06863-code/OCFGAN-master/._.gitignore
- 06863-code/OCFGAN-master/stl10.sh
- __MACOSX/06863-code/OCFGAN-master/._stl10.sh
- 06863-code/OCFGAN-master/celeba128.sh
- __MACOSX/06863-code/OCFGAN-master/._celeba128.sh
- 06863-code/OCFGAN-master/data/
- __MACOSX/06863-code/OCFGAN-master/._data
- 06863-code/OCFGAN-master/src/
- __MACOSX/06863-code/OCFGAN-master/._src
- 06863-code/OCFGAN-master/imgs/ecf.png
- __MACOSX/06863-code/OCFGAN-master/imgs/._ecf.png
- 06863-code/OCFGAN-master/imgs/ecfd.png
- __MACOSX/06863-code/OCFGAN-master/imgs/._ecfd.png
- 06863-code/OCFGAN-master/imgs/celeb4x8.png
- __MACOSX/06863-code/OCFGAN-master/imgs/._celeb4x8.png
- 06863-code/OCFGAN-master/data/.gitkeep
- __MACOSX/06863-code/OCFGAN-master/data/._.gitkeep
- 06863-code/OCFGAN-master/src/gan.py
- __MACOSX/06863-code/OCFGAN-master/src/._gan.py
- 06863-code/OCFGAN-master/src/cfgan.py
- __MACOSX/06863-code/OCFGAN-master/src/._cfgan.py
- 06863-code/OCFGAN-master/src/util.py
- __MACOSX/06863-code/OCFGAN-master/src/._util.py
- 06863-code/OCFGAN-master/src/datasets.py
- __MACOSX/06863-code/OCFGAN-master/src/._datasets.py
- 06863-code/OCFGAN-master/src/ecfd.py
- __MACOSX/06863-code/OCFGAN-master/src/._ecfd.py
- 06863-code/OCFGAN-master/src/networks.py
- __MACOSX/06863-code/OCFGAN-master/src/._networks.py
- 06863-code/OCFGAN-master/src/resnet.py
- __MACOSX/06863-code/OCFGAN-master/src/._resnet.py
- 06863-code/OCFGAN-master/src/gen_samples.py
- __MACOSX/06863-code/OCFGAN-master/src/._gen_samples.py
- 06863-code/OCFGAN-master/src/main.py
- __MACOSX/06863-code/OCFGAN-master/src/._main.py
