# Supplementary material
Source: ML conference proceedings conference paper supplement (https://openaccess.thecvf.com/content/CVPR_2020/html/Ansari_A_Characteristic_Function_CVPR_2020_paper.html)
Supplement: Supplementary file 2 [file Ansari_A_Characteristic_Function_CVPR_2020_supplemental.zip › 06863-code/ReadMe.txt]

Any updates to this code will be available at: https://github.com/crslab/OCFGAN
